# Supplementary material
Source: PubMed Central journal article supplement (PMC3403100)
Supplement: supp_139.16.2878_DEV074765TableS1.pdf [file supp_139.16.2878_DEV074765TableS1.pdf]

**Table S1. RT-PCR primer sequences**

| <b>Primer name</b>                  | <b>Forward primer (5'-3')</b>  | <b>Reverse primer (5'-3')</b>      |
|-------------------------------------|--------------------------------|------------------------------------|
| <i>Rest</i>                         | GCGGAAGACAAATGCAGG             | TTCGGCTTCGTA CTGGCAA               |
| <i>CoRest</i>                       | TGGGACCTACCTCCAGTTG            | TGTTGATTGGGAGAGCTGCC               |
| synaptotagmin<br>4 ( <i>Syt 4</i> ) | AATGAGGTGATTGGACGGTTG          | AGTGCCCCCACC GC                    |
| <i>Snap25</i>                       | ACGGGAGCAGATGGCCA              | CCCGGGCATCGTTTGT T                 |
| calbindin<br>( <i>Calb</i> )        | GCTGCAGAACTTGATCCAGGA          | TCCGGTGATAGCTCCAATCC               |
| <i>NeuroD1</i>                      | ACCAATTTGGTCGCCGG              | GGGTTCTGCTCAGGCAAGAA               |
| <i>Celsr3</i>                       | GGACTTTGGAAATGACATGGC          | CAGACAGCAACCCTCGATC                |
| <i>L1cam</i>                        | GAGGTTTCAGGGCATCTATCG          | TTGCTGTTCATCCAGTAGATCC             |
| <i>Chgb</i>                         | AGTCCAGTGTTCCAACGATC           | ACTTCTCATTGCCTACCTTCG              |
| <i>Syn1</i>                         | ACAGGTTCTGCTATGCTTGAG          | TGACCACAAGTCCACGATG                |
| <i>Mal</i>                          | TTGTA CT CATGGCGGTGAGACTT      | TCAGAGTGACCACGTAGGCAAACA           |
| <i>Myt1</i>                         | ATTCAGACCAGCGAAACCTC           | ATGCTCAAGTCCAGAGTTCC               |
| <i>Myt1L</i>                        | ATTGCTGGGACTTGCCTGTAGACT       | TGCTTTCCTTGCACTGAGGGTACT           |
| <i>Mbp</i>                          | CAAGGCACAGAGACACGG             | ACTGGGTTTTTCATCTTGGGTC             |
| <i>Mag</i>                          | CTGTGGTACATGGCGTCTGGTATT       | TGTGCTGAGAAGCAGGGTACAGTT           |
| <i>Mobp</i>                         | AATGAGAGCAAGACAAGCGGAGAC       | ACGCTTGGAGTTGAGGAAGGTGAA           |
| <i>Cdk6</i>                         | AGC ACC CCA ACG TGG TCA GG     | AGC GTG ACG ACC ACC GAG GTA        |
| <i>Cyclin B2</i>                    | GCT GTG CCT CGT CCG TT         | GCG GGA GGA CGA TCC TTG GGA        |
| <i>Cdk1C</i>                        | CAC CAA TCA GCC AGC CTT CGA CC | GGG ATG ACA GCC ACG GCC AC         |
| <i>Camk2</i>                        | CGA GCC ATT GCC GTC GGA GG     | CGC TGC CTT GCT TCC TTG GGC        |
| <i>Gap43</i>                        | AGC TGA GGA GAA AGA CGC TGT    | GGG TTC AGG TGG GGG CAA CG         |
| <i>Scn2a1</i>                       | TCA GCT GAC CTT GCG TGC TG     | TCC GAG AAA ACA CCT ATC CCA<br>CCT |
| <i>Gapdh</i>                        | AGAAGGTGGTGAAGCAGGCA           | CGAAGGTGGAAGAGTGGGAG               |
